# Supplementary material
Source: PubMed Central journal article supplement (PMC7679188)
Supplement: oe-28-22-33019-s001.pdf [file oe-28-22-33019-s001.pdf]

## 7X multiplexed, optofluidic detection of nucleic acids for antibiotic-resistance bacterial screening: supplement

G. G. MEENA,<sup>1</sup>  T. A. WALL,<sup>2</sup> M. A. STOTT,<sup>2</sup> O. BROWN,<sup>3</sup> R. ROBISON,<sup>3</sup> A. R. HAWKINS,<sup>2</sup> AND H. SCHMIDT<sup>1,\*</sup>

<sup>1</sup>*School of Engineering, University of California, Santa Cruz, 1156 High Street, Santa Cruz, California 95064, USA*

<sup>2</sup>*Electrical and Computer Engineering Department, Brigham Young University, Provo, Utah 84602, USA*

<sup>3</sup>*Department of Microbiology and Molecular Biology, Brigham Young University, Provo, Utah 84602, USA*

\*[hschmidt@soe.ucsc.edu](mailto:hschmidt@soe.ucsc.edu)

---

This supplement published with The Optical Society on 19 October 2020 by The Authors under the terms of the [Creative Commons Attribution 4.0 License](https://creativecommons.org/licenses/by/4.0/) in the format provided by the authors and unedited. Further distribution of this work must maintain attribution to the author(s) and the published article's title, journal citation, and DOI.

Supplement DOI: <https://doi.org/10.6084/m9.figshare.12782303>

Parent Article DOI: <https://doi.org/10.1364/OE.402311>

# 7X multiplexed, optofluidic detection of nucleic acids for antibiotic-resistance bacterial screening: supplemental document

G.G. MEENA<sup>1</sup>, T.A. WALL<sup>2</sup>, M.A. STOTT<sup>2</sup>, O. BROWN<sup>3</sup>, R. ROBISON<sup>3</sup>, A.R. HAWKINS<sup>2</sup> AND H. SCHMIDT<sup>1\*</sup>

<sup>1</sup>*School of Engineering, University of California, Santa Cruz, 1156 High Street, Santa Cruz, California 95064*

<sup>2</sup>*Electrical and Computer Engineering Department, Brigham Young University, Provo, Utah 84602*

<sup>3</sup>*Department of Microbiology and Molecular Biology, Brigham Young University, Provo, Utah 84602*

\* [hschmidt@soe.ucsc.edu](mailto:hschmidt@soe.ucsc.edu)

## Device fabrication

The ARROW chips were fabricated on a 100 mm <100> oriented silicon wafer. A sequence of dielectric layers was sputter deposited on the substrate for optical guiding. These cladding layers consisted of Ta<sub>2</sub>O<sub>5</sub> and SiO<sub>2</sub> (refractive index 2.107 and 1.46 respectively). The sequence of the dielectric material layers was chosen to be SiO<sub>2</sub>/ Ta<sub>2</sub>O<sub>5</sub>/ SiO<sub>2</sub>/ Ta<sub>2</sub>O<sub>5</sub>/ SiO<sub>2</sub>/ Ta<sub>2</sub>O<sub>5</sub>/ starting from the substrate with thickness 265/102/265/102/265/102/ nm. SU8 photoresist (Microchem) was spun on top, patterned and developed to define a 5 μm x 12 μm (thickness x width) LC waveguide channel. SU8 photoresist and a thin nickel layer were used as a mask to selectively etch a self-aligned pedestal into the wafer using a reactive inductively coupled-plasma reactive ion etcher (ICP-RIE). A single layer of 5 μm SiO<sub>2</sub> (refractive index 1.51) was deposited on top of the SU8 by plasma-enhanced chemical vapor deposition (PECVD). 4 μm tall ridges were etched into this SiO<sub>2</sub> layer using ICP-RIE to form the single mode SC waveguide, MMI waveguide and SC collection waveguides which intersect the LC waveguide at multiple points. The thickness and etch depth of the waveguide were optimized to tightly confine the modes for proper self-imaging by the MMI waveguide. On top of this, a 6 μm thick protective layer of low index SiO<sub>2</sub> (refractive index 1.448) was deposited using PECVD, thus forming buried ridge SC waveguides. Fluidic inlets into the LC waveguide channels were exposed with a wet etch through the top layers of SiO<sub>2</sub> and the SU8 was then removed with H<sub>2</sub>SO<sub>4</sub> : H<sub>2</sub>O<sub>2</sub> solution to form the hollow core. The buried architecture prevents water absorption of the waveguides during cleaning steps and helps improve optical coupling between SC and LC waveguides. Fig. S1 shows cross sectional SEM images of both the solid and hollow-core waveguides.

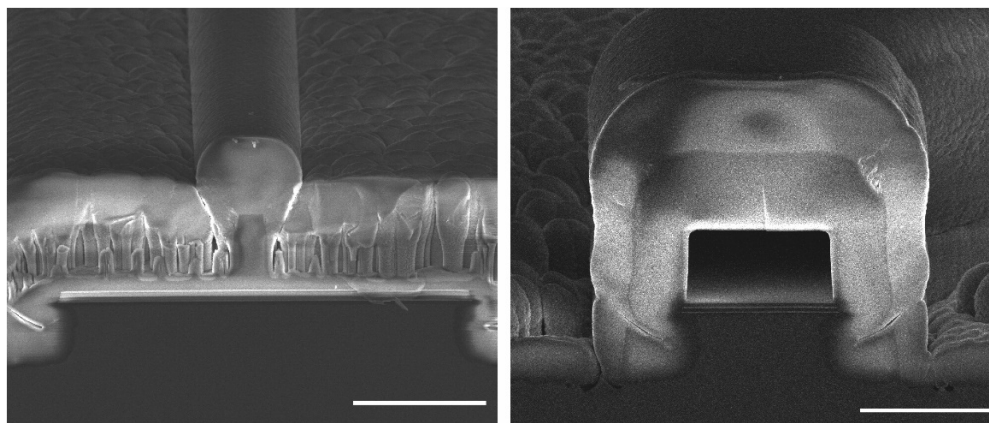

Figure S1: Cross sectional SEM image of SC and LC ARROW waveguides (Scale bar: 10  $\mu\text{m}$ ). The SEM image clearly shows the ARROW layers on the Si substrate. The SC waveguide has a high refractive index  $\text{SiO}_2$  (1.51) core and low refractive index  $\text{SiO}_2$  (1.448) cladding.

### Assay preparation

10  $\mu\text{L}$  of 3  $\mu\text{M}$  synthetic nucleic acid strands corresponding to antibiotic resistant bacterial target was mixed with 10  $\mu\text{L}$  of 10  $\mu\text{M}$  of target specific fluorescent probe oligomers [IDT DNA Inc.]. The final volume for each target-probe mixture was made to 30  $\mu\text{L}$  by adding 1XT50 buffer. The target-probe mixture was heated to 95 $^{\circ}\text{C}$  for 5 mins and incubated for 3 hrs. Streptavidin coated magnetic beads [Dynabeads<sup>TM</sup>] were functionalized with target specific biotinylated capture oligomers. After incubation the hybridized target-probe structure was mixed with the functionalized magnetic bead and rotator mixed for 1 hr. A magnet kept under the vial was used to pull down the magnetic bead assay with the captured target-probe complex. All unbound nucleic acid strands were washed off and the assay was resuspended.

### $\delta t_c$ Calculation

The total time of an event  $\Delta T$  is found from the start and end of an event signal using a peak finding algorithm (Fig. S2). The velocity of each assay is calculated from the total time  $\Delta T$  taken by the assay to travel the 75  $\mu\text{m}$  wide MMI waveguide intersection.  $\delta t_c$  is then calculated by using the distance between adjacent spots ( $\delta x_c$ , Fig. S2) generated by the MMI waveguide for the three excitation wavelengths (Equation S1).

$$\delta t_c = \frac{\Delta T \cdot \delta x_c}{75 \mu\text{m}} \quad \text{Equation (S1)}$$

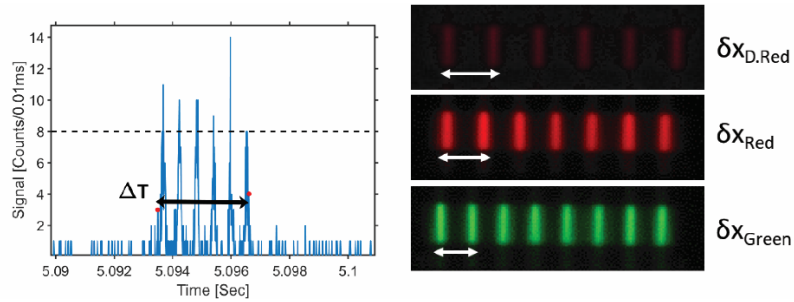

Figure S2 Calculation of  $\delta t_c$  values of individual events

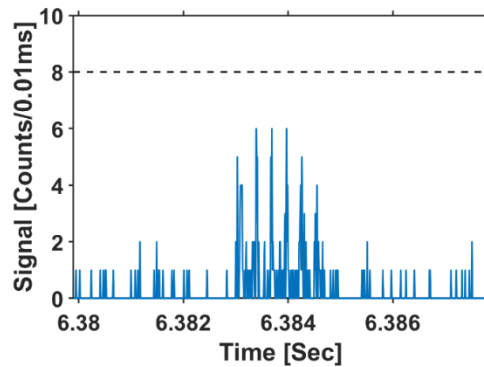

Figure S3 Signal from bead with *E. coli* target below the threshold

| Target name | Capture Oligomer                                                                    | Fluorescent probe oligomer                                                                                                                                   | Color Code         |
|-------------|-------------------------------------------------------------------------------------|--------------------------------------------------------------------------------------------------------------------------------------------------------------|--------------------|
| E.Coli      | 5'AACGGGGAAACTCAGCAAGC<br>GCACTTACAGG/3BioTEG/                                      | 5'/5Alex750N/GCT<br>ACCAAGCCGAAAGAACTGTA<br>CAGCGAAGAGGCAGTGTAGC3'                                                                                           | Dark red           |
| KPC         | 5'GGTGGCAGAAAAGCCAGCCA<br>GCGGCCATGAGAGACAAGAC<br>AGCAGAACTAGACGGCGATA<br>/3BIOTEG/ | /5TYE665/CGCACAA<br>AGTCCTGTTTCGAGTTTAGCG<br>AATGGTTCCGCGACGATGCG3'                                                                                          | Red                |
| VIM         | 5'TCTGGTAAAGTCGGACCTCT<br>CCGACCGGAATTCGTTGAC<br>TGTCG/3BioTEG/                     | 5'TCGCCGTCAAACGACTGCGT<br>TGCGATATGCGACCAAACAC<br>CGGCGA/3AlexF546N/                                                                                         | Green              |
| IMP         | 5'GATGGATTGAGAATTAAGCC<br>ACTCTATTCCGCCCGTGCTG<br>TCAGCCCG/3BioTEG/                 | /5Alex750N/TTTAAGCAGCTCATTAGT<br>TAATTCAGACGCATACGTGGG3'<br>/5TYE665/ACTAGGTTATCTGGAG<br>TGTGTCCTGGGCCTGGAT3'                                                | Dark red-Red       |
| NDM         | 5'ATGTCGAGATAGGAAGTGTG<br>CTGCGAAACCCGCCAGACA<br>TTCGGTGCGA/3BioTEG/                | /5Alex546N/ACC<br>GACATCCCTGACGATCAAAC<br>CGTTGGAAGCGACTGTCGGT3'<br>5'GATGCGTTGATCTCCTGCTT<br>GATCCAGTTGAGGATCTGGG<br>CGCATC/3TYE665/                        | Red-Green          |
| K.Pneu      | /5BiotinTEG/GTCGCCAGGC<br>CGCTGGCGCGCTTGGTCATA<br>AAGTTATCGGTCTGGGCAGA3'            | /5Alex546N/ CGCCGCCGAATT<br>CCGGGAACATATCGGTCCAG3'<br>5'CGTACAGGGCGCCAAGGTTA<br>CGACCGTAGTC/3AlexF750N/                                                      | Green-Dark red     |
| E.Aero      | 5'AACAACCGTATCGGTGACAA<br>CCATGACACCGCGTTTCCC<br>CAGTATTCGCTGGCG/3BioTEG/           | 5'CCGCTGCGGCGGCATGGTAT<br>GGCGCGCTGACTCC /3AlexF750N/<br>/5Alex546N/CTGGGTTACCCGA<br>TCACTGACGATCTGGACATC<br>/5TYE665/CGGCGCATTCAAAG<br>CTCAGGGCGTTCAGCTGACC | Dark red-Red-Green |

**Table S1. Oligomer summary**

Summary of the oligomers used for fluorescent tagging and capturing of the synthetic target nucleic acids.
